# Supplementary material for: Folate-modified hydroxyapatite nanorods induce apoptosis in MCF-7 cells through a mitochondrial-dependent pathway
Source: Royal Society of Chemistry journal article supplement (doi:10.1039/c9nj03653a), 2019-01-01
Supplement: c9nj03653a1.pdf [file c9nj03653a1.pdf]

## Supporting Information

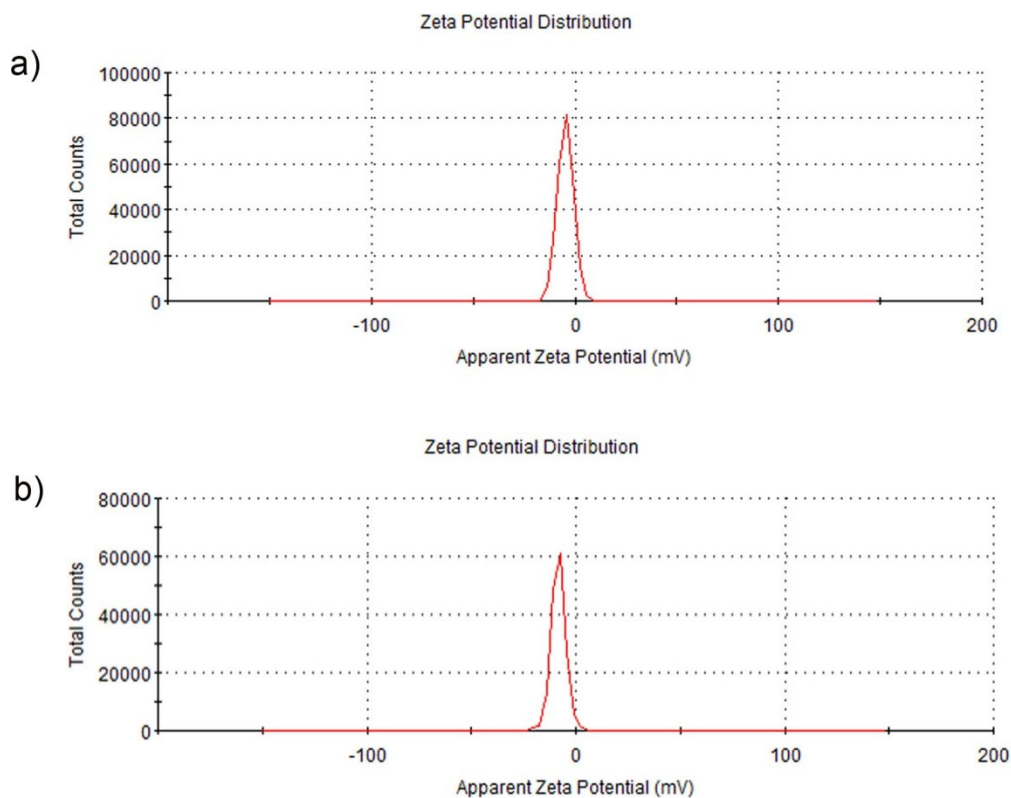

**Fig.S1** Zeta potential measurements of DOX@HAP (a) and DOX@HAP-FA (b) nanorods.

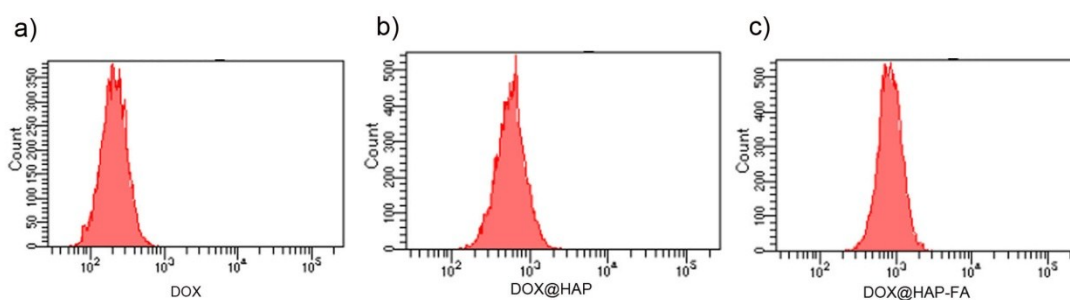

**Fig.S2** Flow cytometry analysis of MCF-7 cells incubated with DOX (a), DOX@HAP (b) and DOX@HAP-FA (c) nanorods for 6 h.
